# Supplementary material for: Isolating key reaction energetics and thermodynamic properties during hardwood model lignin pyrolysis
Source: Royal Society of Chemistry journal article supplement (doi:10.1039/d1cp02917g), 2021-01-01
Supplement: d1cp02917g1.pdf [file d1cp02917g1.pdf]

SUPPLEMENTARY INFORMATION

**Isolating key reaction energetics with prediction  
of thermodynamic properties during hardwood  
lignin pyrolysis using model oligomer**

*Tanzina Azad<sup>1</sup>, Maria L. Auad<sup>1, 2</sup>, Thomas Elder<sup>3</sup>, Andrew J. Adamczyk<sup>1,\*</sup>*

<sup>1</sup>Department of Chemical Engineering, Auburn University, Auburn, AL, USA.

<sup>2</sup>Director, Center for Polymer and Advanced Composites, Auburn, AL, USA.

<sup>3</sup>United States Department of Agriculture (USDA) Forest Service, Southern Research Station,  
Auburn, AL, USA.

\*Corresponding author: [aja0056@auburn.edu](mailto:aja0056@auburn.edu)

## Tables

| Table # | Title                                                                                                                                                                     |
|---------|---------------------------------------------------------------------------------------------------------------------------------------------------------------------------|
| S1      | Variation of Reaction enthalpies along 9 pathways in the full range of temperature considered in this study (After performing conformational sampling)                    |
| S2      | Heat capacity $C_p$ (Cal/mol. K) variation with temperature (K) for product 1 structures                                                                                  |
| S3      | Heat capacity $C_p$ (Cal/mol. K) variation with temperature (K) for product 2 structures                                                                                  |
| S4      | Entropy S (Cal/mol. K) variation with temperature (K) for product 1 structures                                                                                            |
| S5      | Entropy S (Cal/mol. K) variation with temperature (K) for product 2 structures                                                                                            |
| S6      | Gibbs free energy G (Hartree) variation with temperature (K) for product 1 structures                                                                                     |
| S7      | Gibbs free energy G (Hartree) variation with temperature (K) for product 2 structures                                                                                     |
| S8      | Variation of Gibbs free energy change $\Delta G$ (Hartree) with temperature (K) for 9 reaction pathways                                                                   |
| S9      | Heat capacity $C_p$ (Cal/mol. K), Entropy S (Cal/mol. K) and Gibbs free energy G (Hartree) variation with temperature (K) for 10-mer reactant structure                   |
| S10a)   | Spin density and Molecular orbital plots for product 1 species                                                                                                            |
| S10b)   | Spin density and Molecular orbital plots for product 2 species                                                                                                            |
| S11     | Key results of the Paired T test to identify if statistically significant variation exists between the mean BDEs calculated using soft and hardwood model lignin decamers |

| Figure # | Title                                                                                                                                                                                    |
|----------|------------------------------------------------------------------------------------------------------------------------------------------------------------------------------------------|
| S1       | Heat capacity variation with temperature for 10-mer reactant structure                                                                                                                   |
| S2       | Entropy variation with temperature for 10-mer reactant structure                                                                                                                         |
| S3       | Gibbs free energy variation with temperature for 10-mer reactant structure                                                                                                               |
| S4       | Gibbs free energy variation with temperature for product 1 radical species                                                                                                               |
| S5       | Gibbs free energy variation with temperature for product 2 radical species                                                                                                               |
| S6       | Comparison between the current study for BDEs for the hardwood model lignin and the calculated BDEs with a softwood model lignin in our previous study                                   |
| S7       | Comparison between non-bonded interaction energies for all structures between current study (hardwood model lignin with S units) and previous study (softwood model lignin with G units) |

## Computational methodology (Extended)

Bond dissociation enthalpies were calculated as the difference of the sum of the standard enthalpies of formation of the product fragments and the standard enthalpy of formation of the reactant, as shown in Equation 5,

$$\text{BDE}_{298}(\text{Reactant}) = [\Delta H_{f,298}^{\circ}(\text{Product 1}) + \Delta H_{f,298}^{\circ}(\text{Product 2})] - \Delta H_{f,298}^{\circ}(\text{Reactant}) \quad [5]$$

Where  $\Delta H_{f,298}^{\circ}$  is the standard enthalpy of formation of the radical species Products 1 and 2, and the 10-mer lignin molecule as reactant. These standard enthalpy of formation values are calculated using a hybrid methodology based on quantum chemical calculations, statistical thermodynamics, and experimental atomization energies as performed in previous work from our group<sup>64</sup>.

The basis for these standard enthalpy of formation values were calculated using Equation [2, 2.1-2.4] to account for the enthalpy correction, then this correction was added to the electronic energy ( $E_{el}$ ) and zero point energies (ZPE) using Equation [6],

$$H_{298} = E_{el} + \text{ZPE} + H(T) \quad [6]$$

The standard enthalpy of formation of a given species ( $C_xH_yO_z$ ) was then calculated from its atomization energy using Equation 7,

$$\Delta H_{f,298}^{\circ}(C_xH_yO_z) = [x\Delta H_{f,298}^{\circ}(C) + y\Delta H_{f,298}^{\circ}(H) + z\Delta H_{f,298}^{\circ}(O)] - \Delta H_{a,298}^{\circ}(C_xH_yO_z) \quad [7]$$

Where the enthalpies of formation of atomic C, H and O are the experimental values obtained from the NIST-JANAF thermochemical tables ( $\Delta H_{f,298}^{\circ}(\text{C}) = 172.001 \text{ kcal mol}^{-1}$ ,  $\Delta H_{f,298}^{\circ}(\text{H}) = 52.32 \text{ kcal mol}^{-1}$ ,  $\Delta H_{f,298}^{\circ}(\text{O}) = 59.803 \text{ kcal mol}^{-1}$ ) and  $\Delta H_{a,298}^{\circ}(\text{C}_x\text{H}_y\text{O}_z)$  is the atomization enthalpy defined as the enthalpy change upon decomposition of a molecule into its component atoms, which can be evaluated as Equation 7.1,

$$\Delta H_{a,298}^{\circ}(\text{C}_x\text{H}_y\text{O}_z) = [xH_{298}(\text{C}) + yH_{298}(\text{H}) + zH_{298}(\text{O})] - H_{298}(\text{C}_x\text{H}_y\text{O}_z) \quad [7.1]$$

Where  $H_{298}(\text{C})$ ,  $H_{298}(\text{H})$  and  $H_{298}(\text{O})$  are the enthalpies of atomic C, H and O at 298K, respectively, and  $H_{298}(\text{C}_x\text{H}_y\text{O}_z)$  is the enthalpy of  $\text{C}_x\text{H}_y\text{O}_z$  at the same temperature. These enthalpies can be calculated as previously mentioned in Equation [2, 2.1-2.4, 6]. These quantities are obtained from quantum chemical calculations and statistical thermodynamics.

The enthalpy of reaction at the elevated temperature, or BDE at temperature T, is then calculated using the calculated  $\text{BDE}_{298\text{K}}$  and temperature-dependent heat capacity values following Equation 8,

$$\text{BDE}_T = \text{BDE}_{298\text{K}} + \int_{298\text{K}}^T \Delta C_{p,\text{Rxn}}(T) dT \quad [8]$$

Where  $\Delta C_{p,\text{Rxn}}(T)$  is the temperature-dependent polynomial defined as the difference between sum of temperature-dependent standard heat capacities of the products and the temperature-dependent standard heat capacity of the reactant.

Vibrational frequency calculations of these optimized structures were performed to determine thermochemical parameters - enthalpy (H), entropy (S), free energy (G), and heat capacity at constant pressure ( $C_p$ ). These values reported in this work are based on the standard statistical thermodynamic calculations using the standard molecular partition functions of polyatomic gas molecules<sup>70</sup>. The enthalpy correction, H, using the ideal gas approximation is given by Equation 2,

$$H(T) = E_{\text{vib}}(T) + E_{\text{rot}}(T) + E_{\text{trans}}(T) + RT \quad [2],$$

where the subscripts represent vibrational, rotational, and translational contributions, respectively, and R is the ideal gas constant. The contributions are given by,

$$E_{\text{trans}} = \frac{3}{2}RT \quad [2.1]$$

$$E_{\text{rot (linear)}} = RT \quad [2.2]$$

$$E_{\text{rot (nonlinear)}} = \frac{3}{2}RT \quad [2.3]$$

$$E_{\text{vib}} = \frac{R}{k} \frac{1}{2} \sum_i hv_i + \frac{R}{k} \sum_i \frac{hv_i \exp\left(-\frac{hv_i}{kT}\right)}{\left[1 - \exp\left(-\frac{hv_i}{kT}\right)\right]} \quad [2.4]$$

Where, k and h are the Boltzmann and Planck's constants, respectively and  $\nu_i$  is the individual vibrational frequency.

Similarly, heat capacity at constant pressure ( $C_p$ ) calculations are based on the ideal gas approximation and is given by Equation 3,

$$C_p(T) = C_{p,vib}(T) + C_{p,rot}(T) + C_{p,trans}(T) + RT \quad [3]$$

The contributions are given by,

$$C_{p,trans} = \frac{5}{2}RT \quad [3.1]$$

$$C_{p,rot (linear)} = R \quad [3.2]$$

$$C_{p,rot (nonlinear)} = \frac{3}{2}RT \quad [3.3]$$

$$C_{p,vib} = R \sum_i \frac{\left(\frac{h\nu_i}{kT}\right)^2 \exp\left(-\frac{h\nu_i}{kT}\right)}{\left[1 - \exp\left(-\frac{h\nu_i}{kT}\right)\right]^2} \quad [3.4]$$

The entropy correction is given by Equation 4,

$$S(T) = S_{vib}(T) + S_{rot}(T) + S_{trans}(T) + RT \quad [4]$$

The contributions are given by,

$$S_{trans} = \frac{5}{2}R \ln T + \frac{3}{2}R \ln \omega - R \ln p - 2.31482 \quad [4.1]$$

$$S_{rot (linear)} = R \ln \frac{8 \prod I k T}{\sigma h^2} + R \quad [4.2]$$

$$S_{rot (nonlinear)} = \frac{R}{2} \ln \left[ \frac{\prod \sqrt{\sigma}}{h} \frac{8 \prod^2 c I_A}{h} \frac{8 \prod^2 c I_B}{h} \frac{8 \prod^2 c I_C}{h} \left(\frac{T k_B}{hc}\right)^3 \right] + \frac{3}{2}R \quad [4.3]$$

$$S_{\text{vib}} = R \sum_i \frac{\frac{h\nu_i}{k_B T} \exp\left(-\frac{h\nu_i}{k_B T}\right)}{1 - \exp\left(-\frac{h\nu_i}{k_B T}\right)} - R \sum_i \ln \left[1 - \exp\left(-\frac{h\nu_i}{k_B T}\right)\right] \quad [4.4]$$

Where  $\omega$  denotes molecular weight,  $I_x$  is the moment of inertia about axis X, and  $\sigma$  is the rotational symmetry number.

**Table S1.** Variation of Reaction enthalpies (kcal mol<sup>-1</sup>) along 9 pathways in the full range of temperature considered in this study

| T(K)          | RXN_S1            | RXN_S2          | RXN_S3          | RXN_S4          | RXN_S5          | RXN_S6          | RXN_S7          | RXN_S8          | RXN_S9          |
|---------------|-------------------|-----------------|-----------------|-----------------|-----------------|-----------------|-----------------|-----------------|-----------------|
| 25            | 69.0957656        | 58.92284        | 45.88937        | 47.80884        | 67.47497        | 66.46422        | 77.66425        | 64.30142        | 68.08188        |
| 50            | 69.2457656        | 59.11784        | 46.04337        | 47.91984        | 67.57997        | 66.58022        | 77.60325        | 64.33442        | 68.16088        |
| 75            | 69.4367656        | 59.35684        | 46.22537        | 48.02884        | 67.68197        | 66.65622        | 77.52625        | 64.41042        | 68.20988        |
| 100           | 69.6727656        | 59.62984        | 46.45937        | 48.14984        | 67.77297        | 66.71922        | 77.44425        | 64.49342        | 68.24888        |
| 125           | 69.9407656        | 59.93584        | 46.73637        | 48.27684        | 67.83997        | 66.77022        | 77.34825        | 64.55242        | 68.27488        |
| 150           | 70.2317656        | 60.26884        | 47.04537        | 48.40784        | 67.88897        | 66.81522        | 77.24325        | 64.57742        | 68.28788        |
| 175           | 70.5387656        | 60.63184        | 47.38137        | 48.54784        | 67.91797        | 66.85622        | 77.12925        | 64.57442        | 68.28588        |
| 200           | 70.8567656        | 61.01584        | 47.73937        | 48.69884        | 67.93197        | 66.89922        | 77.00725        | 64.54342        | 68.27288        |
| 225           | 71.1827656        | 61.42084        | 48.11537        | 48.86284        | 67.92997        | 66.94522        | 76.87725        | 64.49042        | 68.24888        |
| 250           | 71.5087656        | 61.84084        | 48.50637        | 49.04084        | 67.91597        | 66.99622        | 76.73825        | 64.41642        | 68.21588        |
| 275           | 71.8367656        | 62.27384        | 48.90837        | 49.23184        | 67.88897        | 67.05322        | 76.59125        | 64.32642        | 68.17488        |
| <b>298.15</b> | <b>72.1387656</b> | <b>62.68084</b> | <b>49.28637</b> | <b>49.41784</b> | <b>67.85297</b> | <b>67.10922</b> | <b>76.44825</b> | <b>64.23042</b> | <b>68.13088</b> |
| 300           | 72.1617656        | 62.71384        | 49.31637        | 49.43484        | 67.84897        | 67.11522        | 76.43625        | 64.22242        | 68.12588        |
| 325           | 72.4867656        | 63.16184        | 49.73337        | 49.64584        | 67.79797        | 67.18022        | 76.27225        | 64.10742        | 68.07088        |
| 350           | 72.8067656        | 63.61284        | 50.15337        | 49.86584        | 67.73497        | 67.25022        | 76.10025        | 63.98142        | 68.00888        |
| 375           | 73.1227656        | 64.06684        | 50.57537        | 50.09284        | 67.66297        | 67.32022        | 75.92025        | 63.84442        | 67.94188        |
| 400           | 73.4347656        | 64.52384        | 50.99937        | 50.32484        | 67.57997        | 67.39422        | 75.73325        | 63.70142        | 67.87088        |
| 425           | 73.7437656        | 64.97984        | 51.42437        | 50.56084        | 67.48797        | 67.46722        | 75.53825        | 63.54942        | 67.79388        |
| 450           | 74.0487656        | 65.43584        | 51.84937        | 50.80084        | 67.38697        | 67.54022        | 75.33725        | 63.39142        | 67.71288        |
| 475           | 74.3507656        | 65.89184        | 52.27437        | 51.04284        | 67.27697        | 67.61222        | 75.13025        | 63.22842        | 67.62788        |
| 500           | 74.6477656        | 66.34484        | 52.69837        | 51.28584        | 67.16097        | 67.68522        | 74.91825        | 63.05842        | 67.54088        |
| 525           | 74.9417656        | 66.79584        | 53.12137        | 51.53084        | 67.03597        | 67.75522        | 74.70025        | 62.88442        | 67.44888        |
| 550           | 75.2317656        | 67.24484        | 53.54237        | 51.77684        | 66.90597        | 67.82322        | 74.47925        | 62.70442        | 67.35488        |
| 575           | 75.5197656        | 67.69284        | 53.96137        | 52.02384        | 66.76897        | 67.89122        | 74.25325        | 62.52042        | 67.25788        |
| 600           | 75.8057656        | 68.13784        | 54.38037        | 52.27284        | 66.62597        | 67.95722        | 74.02325        | 62.33542        | 67.15788        |
| 625           | 76.0877656        | 68.58184        | 54.79737        | 52.52184        | 66.47697        | 68.02122        | 73.79125        | 62.14442        | 67.05688        |
| 650           | 76.3677656        | 69.02184        | 55.21237        | 52.77084        | 66.32397        | 68.08522        | 73.55525        | 61.95042        | 66.95288        |
| 675           | 76.6447656        | 69.45984        | 55.62637        | 53.02084        | 66.16397        | 68.14522        | 73.31525        | 61.75342        | 66.84588        |
| 700           | 76.9207656        | 69.89584        | 56.03937        | 53.26984        | 66.00097        | 68.20422        | 73.07525        | 61.55342        | 66.73888        |
| 725           | 77.1947656        | 70.32984        | 56.45037        | 53.52084        | 65.83397        | 68.26122        | 72.83125        | 61.35242        | 66.62988        |
| 750           | 77.4667656        | 70.76284        | 56.86037        | 53.77084        | 65.66197        | 68.31922        | 72.58525        | 61.14842        | 66.51888        |
| 775           | 77.7357656        | 71.19184        | 57.26837        | 54.02184        | 65.48597        | 68.37322        | 72.33725        | 60.94142        | 66.40588        |
| 800           | 78.0047656        | 71.61984        | 57.67637        | 54.27184        | 65.30797        | 68.42622        | 72.08825        | 60.73242        | 66.29188        |
| 825           | 78.2727656        | 72.04684        | 58.08237        | 54.52384        | 65.12497        | 68.47822        | 71.83725        | 60.52242        | 66.17688        |
| 850           | 78.5377656        | 72.47084        | 58.48837        | 54.77484        | 64.94097        | 68.53022        | 71.58525        | 60.30942        | 66.06088        |
| 875           | 78.8047656        | 72.89484        | 58.89337        | 55.02684        | 64.75297        | 68.58022        | 71.33225        | 60.09642        | 65.94388        |
| 900           | 79.0677656        | 73.31684        | 59.29737        | 55.27684        | 64.56197        | 68.62722        | 71.07825        | 59.88142        | 65.82488        |



|             |            |          |          |          |          |          |          |          |          |
|-------------|------------|----------|----------|----------|----------|----------|----------|----------|----------|
| <b>925</b>  | 79.3297656 | 73.73784 | 59.70037 | 55.52884 | 64.36897 | 68.67522 | 70.82125 | 59.66442 | 65.70588 |
| <b>950</b>  | 79.5917656 | 74.15584 | 60.10237 | 55.77984 | 64.17297 | 68.72022 | 70.56325 | 59.44642 | 65.58488 |
| <b>975</b>  | 79.8527656 | 74.57384 | 60.50437 | 56.03284 | 63.97297 | 68.76622 | 70.30525 | 59.22642 | 65.46388 |
| <b>1000</b> | 80.1127656 | 74.98984 | 60.90437 | 56.28384 | 63.77397 | 68.81022 | 70.04625 | 59.00542 | 65.34188 |

**Table S2.** Heat capacity  $C_p$  (Cal mol<sup>-1</sup> K<sup>-1</sup>) variation with temperature (K) for product 1 structures

| Temperature (K) | Product1: 1-mer | Product1: 2-mer | Product1: 3-mer | Product1: 4-mer | Product1: 5-mer | Product1: 6-mer | Product1: 7-mer | Product1: 8-mer | Product1: 9-mer |
|-----------------|-----------------|-----------------|-----------------|-----------------|-----------------|-----------------|-----------------|-----------------|-----------------|
| 25              | 11.418          | 13.831          | 21.982          | 25.242          | 25.585          | 33.735          | 31.492          | 35.555          | 43.624          |
| 50              | 15.614          | 22.687          | 36.557          | 45.648          | 51.519          | 68.716          | 70.708          | 76.661          | 92.006          |
| 75              | 20.002          | 32.543          | 52.149          | 66.869          | 78.932          | 104.352         | 111.696         | 117.294         | 143.987         |
| 100             | 24.478          | 42.618          | 67.704          | 87.858          | 105.589         | 138.375         | 150.901         | 154.356         | 194.436         |
| 125             | 28.779          | 52.292          | 82.496          | 107.708         | 130.765         | 169.984         | 187.401         | 188.323         | 241.58          |
| 150             | 32.84           | 61.428          | 96.411          | 126.339         | 154.494         | 199.395         | 221.404         | 220.161         | 285.544         |
| 175             | 36.72           | 70.143          | 109.664         | 144.091         | 177.164         | 227.248         | 253.62          | 250.888         | 327.224         |
| 200             | 40.51           | 78.614          | 122.539         | 161.366         | 199.219         | 254.204         | 284.811         | 281.365         | 367.597         |
| 225             | 44.28           | 86.983          | 135.256         | 178.465         | 221.003         | 280.747         | 315.547         | 312.157         | 407.396         |
| 250             | 48.064          | 95.325          | 147.933         | 195.539         | 242.697         | 307.132         | 346.13          | 343.503         | 447.008         |
| 275             | 51.869          | 103.656         | 160.593         | 212.609         | 264.333         | 333.414         | 376.626         | 375.371         | 486.512         |
| 298.15          | 55.395          | 111.333         | 172.266         | 228.355         | 284.251         | 357.587         | 404.703         | 405.163         | 522.883         |
| 300             | 55.676          | 111.944         | 173.194         | 229.608         | 285.835         | 359.508         | 406.935         | 407.548         | 525.775         |
| 325             | 59.458          | 120.138         | 185.656         | 246.422         | 307.069         | 385.257         | 436.87          | 439.733         | 564.552         |
| 350             | 63.186          | 128.179         | 197.886         | 262.924         | 327.884         | 410.479         | 466.217         | 471.608         | 602.564         |
| 375             | 66.828          | 136.01          | 209.802         | 278.998         | 348.141         | 435.009         | 494.777         | 502.883         | 639.553         |
| 400             | 70.364          | 143.587         | 221.334         | 294.549         | 367.727         | 458.71          | 522.389         | 533.323         | 675.308         |
| 425             | 73.774          | 150.878         | 232.431         | 309.51          | 386.559         | 481.486         | 548.936         | 562.752         | 709.68          |
| 450             | 77.048          | 157.861         | 243.061         | 323.838         | 404.585         | 503.278         | 574.345         | 591.053         | 742.574         |
| 475             | 80.18           | 164.527         | 253.211         | 337.513         | 421.784         | 524.059         | 598.585         | 618.16          | 773.948         |
| 500             | 83.169          | 170.875         | 262.877         | 350.533         | 438.154         | 543.83          | 621.652         | 644.047         | 803.801         |
| 525             | 86.014          | 176.912         | 272.069         | 362.909         | 453.71          | 562.611         | 643.57          | 668.718         | 832.162         |
| 550             | 88.722          | 182.646         | 280.8           | 374.662         | 468.479         | 580.436         | 664.378         | 692.201         | 859.082         |
| 575             | 91.296          | 188.091         | 289.092         | 385.82          | 482.498         | 597.35          | 684.125         | 714.538         | 884.625         |
| 600             | 93.744          | 193.262         | 296.967         | 396.414         | 495.804         | 613.401         | 702.867         | 735.781         | 908.866         |
| 625             | 96.073          | 198.174         | 304.447         | 406.475         | 508.441         | 628.64          | 720.663         | 755.986         | 931.879         |
| 650             | 98.288          | 202.844         | 311.559         | 416.038         | 520.448         | 643.116         | 737.571         | 775.211         | 953.741         |
| 675             | 100.398         | 207.287         | 318.324         | 425.133         | 531.867         | 656.881         | 753.649         | 793.515         | 974.526         |
| 700             | 102.409         | 211.517         | 324.764         | 433.79          | 542.735         | 669.979         | 768.951         | 810.953         | 994.305         |
| 725             | 104.327         | 215.548         | 330.902         | 442.039         | 553.088         | 682.455         | 783.527         | 827.578         | 1013.144        |
| 750             | 106.157         | 219.393         | 336.756         | 449.905         | 562.961         | 694.35          | 797.425         | 843.44          | 1031.105        |

|      |         |         |         |         |         |         |         |         |          |
|------|---------|---------|---------|---------|---------|---------|---------|---------|----------|
| 775  | 107.906 | 223.064 | 342.344 | 457.413 | 572.384 | 705.701 | 810.689 | 858.585 | 1048.243 |
| 800  | 109.578 | 226.571 | 347.682 | 464.585 | 581.384 | 716.542 | 823.358 | 873.057 | 1064.611 |
| 825  | 111.178 | 229.924 | 352.787 | 471.443 | 589.989 | 726.906 | 835.469 | 886.895 | 1080.257 |
| 850  | 112.709 | 233.133 | 357.671 | 478.004 | 598.222 | 736.819 | 847.056 | 900.136 | 1095.225 |
| 875  | 114.176 | 236.206 | 362.348 | 484.285 | 606.104 | 746.31  | 858.149 | 912.814 | 1109.553 |
| 900  | 115.582 | 239.15  | 366.829 | 490.304 | 613.656 | 755.403 | 868.777 | 924.96  | 1123.279 |
| 925  | 116.931 | 241.973 | 371.125 | 496.074 | 620.896 | 764.118 | 878.965 | 936.602 | 1136.436 |
| 950  | 118.225 | 244.681 | 375.245 | 501.608 | 627.84  | 772.477 | 888.737 | 947.767 | 1149.055 |
| 975  | 119.468 | 247.28  | 379.2   | 506.919 | 634.504 | 780.498 | 898.115 | 958.48  | 1161.163 |
| 1000 | 120.661 | 249.775 | 382.996 | 512.018 | 640.903 | 788.199 | 907.118 | 968.763 | 1172.788 |

**Table S3.** Heat capacity  $C_p$  (Cal mol<sup>-1</sup> K<sup>-1</sup>) variation with temperature (K) for product 2 structures

| Temperature (K) | Product 2: 1-mer | Product 2: 2-mer | Product 2:3-mer | Product 2: 4-mer | Product 2:5-mer | Product 2: 6-mer | Product 2:7-mer | Product 2: 8-mer | Product 2: 9-mer |
|-----------------|------------------|------------------|-----------------|------------------|-----------------|------------------|-----------------|------------------|------------------|
| 25              | 11.669           | 13.208           | 17.941          | 22.352           | 29.538          | 30.6             | 32.35           | 40.48            | 41.503           |
| 50              | 16.17            | 21.31            | 32.251          | 41.513           | 58.531          | 62.143           | 65.458          | 81.774           | 86.834           |
| 75              | 21.033           | 30.765           | 48.399          | 62.744           | 88.263          | 96.124           | 100.751         | 122.318          | 133.165          |
| 100             | 26.098           | 40.093           | 64.751          | 84.347           | 116.825         | 129.637          | 134.095         | 160.476          | 177.165          |
| 125             | 31.085           | 48.815           | 80.488          | 105.091          | 143.448         | 161.256          | 164.709         | 195.931          | 217.887          |
| 150             | 35.888           | 56.998           | 95.422          | 124.689          | 168.248         | 190.88           | 193.273         | 229.246          | 255.916          |
| 175             | 40.525           | 64.866           | 109.693         | 143.361          | 191.723         | 219.008          | 220.734         | 261.303          | 292.316          |
| 200             | 45.053           | 72.642           | 123.533         | 161.459          | 214.416         | 246.241          | 247.899         | 292.938          | 328.099          |
| 225             | 49.523           | 80.476           | 137.141         | 179.277          | 236.743         | 273.046          | 275.291         | 324.732          | 363.967          |
| 250             | 53.964           | 88.432           | 150.629         | 196.98           | 258.927         | 299.679          | 303.134         | 356.949          | 400.253          |
| 275             | 58.378           | 96.505           | 164.024         | 214.605          | 281.02          | 326.2            | 331.405         | 389.58           | 436.97           |
| 298.15          | 62.426           | 104.04           | 176.313         | 230.811          | 301.339         | 350.588          | 357.809         | 419.998          | 471.18           |
| 300             | 62.747           | 104.643          | 177.288         | 232.098          | 302.954         | 352.527          | 359.923         | 422.43           | 473.916          |
| 325             | 67.048           | 112.77           | 190.35          | 249.358          | 324.595         | 378.505          | 388.426         | 455.213          | 510.777          |
| 350             | 71.251           | 120.807          | 203.125         | 266.264          | 345.792         | 403.954          | 416.639         | 487.62           | 547.216          |
| 375             | 75.33            | 128.684          | 215.534         | 282.705          | 366.403         | 428.708          | 444.31          | 519.372          | 582.922          |
| 400             | 79.264           | 136.342          | 227.515         | 298.592          | 386.315         | 452.628          | 471.233         | 550.24           | 617.64           |
| 425             | 83.041           | 143.739          | 239.022         | 313.86           | 405.444         | 475.618          | 497.257         | 580.056          | 651.179          |
| 450             | 86.65            | 150.848          | 250.028         | 328.468          | 423.742         | 497.618          | 522.279         | 608.706          | 683.414          |
| 475             | 90.09            | 157.651          | 260.522         | 342.401          | 441.186         | 518.599          | 546.243         | 636.129          | 714.274          |
| 500             | 93.362           | 164.145          | 270.505         | 355.659          | 457.777         | 538.563          | 569.126         | 662.304          | 743.735          |
| 525             | 96.469           | 170.332          | 279.99          | 368.254          | 473.534         | 557.529          | 590.934         | 687.238          | 771.804          |
| 550             | 99.419           | 176.219          | 288.993         | 380.211          | 488.487         | 575.533          | 611.691         | 710.963          | 798.515          |
| 575             | 102.218          | 181.817          | 297.539         | 391.558          | 502.671         | 592.619          | 631.435         | 733.524          | 823.919          |
| 600             | 104.876          | 187.141          | 305.65          | 402.329          | 516.13          | 608.834          | 650.213         | 754.973          | 848.075          |
| 625             | 107.402          | 192.204          | 313.353         | 412.557          | 528.907         | 624.232          | 668.074         | 775.371          | 871.048          |
| 650             | 109.803          | 197.021          | 320.674         | 422.276          | 541.044         | 638.861          | 685.07          | 794.777          | 892.905          |

|      |         |         |         |         |         |         |         |         |          |
|------|---------|---------|---------|---------|---------|---------|---------|---------|----------|
| 675  | 112.088 | 201.609 | 327.638 | 431.519 | 552.583 | 652.773 | 701.252 | 813.25  | 913.714  |
| 700  | 114.265 | 205.979 | 334.267 | 440.317 | 563.564 | 666.014 | 716.67  | 830.847 | 933.537  |
| 725  | 116.341 | 210.148 | 340.584 | 448.7   | 574.025 | 678.629 | 731.37  | 847.623 | 952.435  |
| 750  | 118.322 | 214.126 | 346.609 | 456.695 | 583.999 | 690.658 | 745.396 | 863.629 | 970.467  |
| 775  | 120.216 | 217.925 | 352.361 | 464.326 | 593.519 | 702.139 | 758.79  | 878.911 | 987.684  |
| 800  | 122.027 | 221.557 | 357.857 | 471.617 | 602.613 | 713.108 | 771.59  | 893.514 | 1004.136 |
| 825  | 123.76  | 225.031 | 363.114 | 478.588 | 611.308 | 723.594 | 783.831 | 907.479 | 1019.869 |
| 850  | 125.421 | 228.357 | 368.144 | 485.26  | 619.629 | 733.629 | 795.545 | 920.841 | 1034.923 |
| 875  | 127.013 | 231.543 | 372.962 | 491.648 | 627.596 | 743.237 | 806.762 | 933.636 | 1049.338 |
| 900  | 128.541 | 234.597 | 377.579 | 497.771 | 635.231 | 752.444 | 817.51  | 945.894 | 1063.149 |
| 925  | 130.007 | 237.526 | 382.006 | 503.641 | 642.552 | 761.271 | 827.814 | 957.646 | 1076.389 |
| 950  | 131.415 | 240.336 | 386.254 | 509.273 | 649.576 | 769.739 | 837.696 | 968.918 | 1089.087 |
| 975  | 132.768 | 243.035 | 390.332 | 514.679 | 656.318 | 777.867 | 847.18  | 979.734 | 1101.273 |
| 1000 | 134.069 | 245.626 | 394.248 | 519.871 | 662.794 | 785.673 | 856.285 | 990.118 | 1112.971 |

**Table S4.** Entropy  $S$  ( $\text{Cal mol}^{-1} \text{K}^{-1}$ ) variation with temperature (K) for product 1 structures

| Temperature (K) | Product 1: 1-mer | Product 1: 2-mer | Product 1: 3-mer | Product 1: 4-mer | Product 1: 5-mer | Product 1: 6-mer | Product 1: 7-mer | Product 1: 8-mer | Product 1: 9-mer |
|-----------------|------------------|------------------|------------------|------------------|------------------|------------------|------------------|------------------|------------------|
| 25              | 57.093           | 64.211           | 77.468           | 80.423           | 81.109           | 85.583           | 86.311           | 94.319           | 99.15            |
| 50              | 66.293           | 76.453           | 97.092           | 104.141          | 106.599          | 119.583          | 119.862          | 131.306          | 143.804          |
| 75              | 73.446           | 87.492           | 114.845          | 126.646          | 132.672          | 154.208          | 156.307          | 170.184          | 190.927          |
| 100             | 79.814           | 98.239           | 131.99           | 148.778          | 159.061          | 188.942          | 193.87           | 209.087          | 239.328          |
| 125             | 85.743           | 108.798          | 148.704          | 170.539          | 185.356          | 223.26           | 231.514          | 247.228          | 287.844          |
| 150             | 91.352           | 119.147          | 164.987          | 191.84           | 211.315          | 256.881          | 268.72           | 284.403          | 335.818          |
| 175             | 96.708           | 129.275          | 180.851          | 212.657          | 236.843          | 289.725          | 305.287          | 320.656          | 382.987          |
| 200             | 101.859          | 139.196          | 196.338          | 233.029          | 261.945          | 321.836          | 341.197          | 356.146          | 429.327          |
| 225             | 106.848          | 148.939          | 211.506          | 253.023          | 286.668          | 353.312          | 376.52           | 391.059          | 474.925          |
| 250             | 111.709          | 158.535          | 226.412          | 272.71           | 311.077          | 384.258          | 411.35           | 425.565          | 519.899          |
| 275             | 116.469          | 168.012          | 241.106          | 292.147          | 335.223          | 414.764          | 445.771          | 459.796          | 564.358          |
| 298.15          | 120.801          | 176.696          | 254.552          | 309.96           | 357.383          | 442.678          | 477.333          | 491.322          | 605.132          |
| 300             | 121.145          | 177.387          | 255.62           | 311.376          | 359.147          | 444.896          | 479.843          | 493.836          | 608.376          |
| 325             | 125.751          | 186.671          | 269.977          | 330.42           | 382.866          | 474.691          | 513.6            | 527.729          | 651.995          |
| 350             | 130.294          | 195.87           | 284.184          | 349.288          | 406.387          | 504.169          | 547.054          | 561.486          | 695.23           |
| 375             | 134.778          | 204.982          | 298.246          | 367.979          | 429.703          | 533.33           | 580.199          | 595.094          | 738.07           |
| 400             | 139.205          | 214.003          | 312.156          | 386.485          | 452.801          | 562.166          | 613.018          | 628.526          | 780.495          |
| 425             | 143.574          | 222.928          | 325.91           | 404.794          | 475.663          | 590.663          | 645.49           | 661.747          | 822.473          |
| 450             | 147.884          | 231.751          | 339.498          | 422.893          | 498.273          | 618.806          | 677.591          | 694.72           | 863.976          |
| 475             | 152.134          | 240.466          | 352.914          | 440.772          | 520.612          | 646.578          | 709.299          | 727.408          | 904.972          |
| 500             | 156.323          | 249.068          | 366.15           | 458.418          | 542.666          | 673.966          | 740.594          | 759.779          | 945.436          |
| 525             | 160.451          | 257.553          | 379.2            | 475.822          | 564.424          | 700.958          | 771.459          | 791.804          | 985.346          |
| 550             | 164.515          | 265.916          | 392.06           | 492.979          | 585.874          | 727.546          | 801.882          | 823.459          | 1024.685         |

|      |         |         |         |         |         |          |          |          |          |
|------|---------|---------|---------|---------|---------|----------|----------|----------|----------|
| 575  | 168.516 | 274.156 | 404.727 | 509.881 | 607.011 | 753.723  | 831.855  | 854.726  | 1063.441 |
| 600  | 172.454 | 282.271 | 417.198 | 526.527 | 627.829 | 779.489  | 861.37   | 885.589  | 1101.607 |
| 625  | 176.328 | 290.261 | 429.474 | 542.915 | 648.328 | 804.84   | 890.426  | 916.038  | 1139.179 |
| 650  | 180.14  | 298.126 | 441.554 | 559.046 | 668.505 | 829.781  | 919.024  | 946.066  | 1176.158 |
| 675  | 183.889 | 305.865 | 453.44  | 574.919 | 688.363 | 854.312  | 947.164  | 975.669  | 1212.545 |
| 700  | 187.577 | 313.481 | 465.134 | 590.538 | 707.903 | 878.44   | 974.851  | 1004.845 | 1248.347 |
| 725  | 191.204 | 320.974 | 476.639 | 605.905 | 727.131 | 902.17   | 1002.091 | 1033.595 | 1283.57  |
| 750  | 194.772 | 328.347 | 487.956 | 621.025 | 746.049 | 925.508  | 1028.89  | 1061.92  | 1318.222 |
| 775  | 198.282 | 335.601 | 499.09  | 635.9   | 764.663 | 948.462  | 1055.255 | 1089.825 | 1352.313 |
| 800  | 201.735 | 342.739 | 510.044 | 650.537 | 782.979 | 971.04   | 1081.195 | 1117.314 | 1385.854 |
| 825  | 205.131 | 349.762 | 520.822 | 664.938 | 801.002 | 993.249  | 1106.718 | 1144.393 | 1418.855 |
| 850  | 208.473 | 356.674 | 531.426 | 679.11  | 818.738 | 1015.098 | 1131.832 | 1171.068 | 1451.328 |
| 875  | 211.761 | 363.477 | 541.862 | 693.058 | 836.193 | 1036.594 | 1156.548 | 1197.345 | 1483.284 |
| 900  | 214.998 | 370.172 | 552.133 | 706.786 | 853.374 | 1057.747 | 1180.873 | 1223.231 | 1514.735 |
| 925  | 218.183 | 376.764 | 562.243 | 720.299 | 870.287 | 1078.564 | 1204.816 | 1248.734 | 1545.692 |
| 950  | 221.319 | 383.253 | 572.195 | 733.602 | 886.938 | 1099.053 | 1228.387 | 1273.861 | 1576.168 |
| 975  | 224.406 | 389.642 | 581.994 | 746.701 | 903.334 | 1119.223 | 1251.595 | 1298.619 | 1606.173 |
| 1000 | 227.446 | 395.935 | 591.643 | 759.599 | 919.479 | 1139.081 | 1274.447 | 1323.016 | 1635.718 |

**Table S5.** Entropy  $S$  ( $\text{Cal mol}^{-1} \text{K}^{-1}$ ) variation with temperature (K) for product 2 structures

| Temperature (K) | Product 2: 1-mer | Product 2: 2-mer | Product 2: 3-mer | Product 2: 4-mer | Product 2: 5-mer | Product 2: 6-mer | Product 2: 7-mer | Product 2: 8-mer | Product 2: 9-mer |
|-----------------|------------------|------------------|------------------|------------------|------------------|------------------|------------------|------------------|------------------|
| 25              | 58.254           | 65.223           | 71.512           | 76.475           | 83.088           | 83.96            | 90.989           | 96.285           | 96.804           |
| 50              | 67.71            | 76.729           | 88.172           | 97.703           | 112.348          | 114.474          | 123.276          | 136.985          | 139.291          |
| 75              | 75.173           | 87.143           | 104.272          | 118.506          | 141.715          | 145.964          | 156.508          | 177.868          | 183.294          |
| 100             | 81.917           | 97.283           | 120.444          | 139.525          | 171.06           | 178.105          | 190.126          | 218.348          | 227.706          |
| 125             | 88.279           | 107.178          | 136.598          | 160.596          | 200.026          | 210.351          | 223.383          | 258.013          | 271.672          |
| 150             | 94.374           | 116.808          | 152.604          | 181.505          | 228.396          | 242.311          | 255.962          | 296.707          | 314.793          |
| 175             | 100.256          | 126.188          | 168.392          | 202.138          | 256.108          | 273.799          | 287.826          | 334.463          | 356.99           |
| 200             | 105.964          | 135.357          | 183.947          | 222.467          | 283.196          | 304.78           | 319.074          | 371.421          | 398.361          |
| 225             | 111.529          | 144.364          | 199.284          | 242.515          | 309.742          | 335.295          | 349.85           | 407.757          | 439.073          |
| 250             | 116.977          | 153.254          | 214.432          | 262.32           | 335.834          | 365.411          | 380.292          | 443.634          | 479.295          |
| 275             | 122.327          | 162.06           | 229.418          | 281.922          | 361.55           | 395.191          | 410.506          | 479.182          | 519.162          |
| 298.15          | 127.207          | 170.161          | 243.166          | 299.915          | 385.075          | 422.507          | 438.344          | 511.883          | 555.844          |
| 300             | 127.595          | 170.806          | 244.26           | 301.346          | 386.944          | 424.68           | 440.564          | 514.488          | 558.767          |
| 325             | 132.787          | 179.503          | 258.968          | 320.608          | 412.05           | 453.904          | 470.5            | 549.596          | 598.158          |
| 350             | 137.911          | 188.155          | 273.544          | 339.708          | 436.884          | 482.869          | 500.321          | 584.521          | 637.348          |
| 375             | 142.966          | 196.76           | 287.983          | 358.642          | 461.448          | 511.569          | 530.013          | 619.25           | 676.324          |
| 400             | 147.954          | 205.31           | 302.279          | 377.398          | 485.734          | 539.989          | 559.552          | 653.76           | 715.059          |
| 425             | 152.874          | 213.8            | 316.419          | 395.961          | 509.733          | 568.108          | 588.906          | 688.019          | 753.516          |
| 450             | 157.723          | 222.218          | 330.395          | 414.318          | 533.429          | 595.907          | 618.042          | 721.99           | 791.656          |

|      |         |         |         |         |         |          |          |          |          |
|------|---------|---------|---------|---------|---------|----------|----------|----------|----------|
| 475  | 162.501 | 230.558 | 344.197 | 432.453 | 556.811 | 623.365  | 646.927  | 755.642  | 829.439  |
| 500  | 167.206 | 238.811 | 357.816 | 450.356 | 579.866 | 650.465  | 675.532  | 788.942  | 866.832  |
| 525  | 171.837 | 246.97  | 371.246 | 468.016 | 602.586 | 677.193  | 703.831  | 821.864  | 903.803  |
| 550  | 176.394 | 255.031 | 384.48  | 485.426 | 624.963 | 703.538  | 731.805  | 854.387  | 940.329  |
| 575  | 180.875 | 262.989 | 397.517 | 502.579 | 646.993 | 729.492  | 759.435  | 886.492  | 976.39   |
| 600  | 185.282 | 270.84  | 410.353 | 519.473 | 668.673 | 755.051  | 786.709  | 918.168  | 1011.97  |
| 625  | 189.615 | 278.583 | 422.988 | 536.106 | 690.004 | 780.211  | 813.617  | 949.404  | 1047.06  |
| 650  | 193.875 | 286.216 | 435.421 | 552.478 | 710.986 | 804.974  | 840.153  | 980.196  | 1081.652 |
| 675  | 198.062 | 293.739 | 447.655 | 568.59  | 731.624 | 829.341  | 866.314  | 1010.54  | 1115.744 |
| 700  | 202.178 | 301.15  | 459.692 | 584.443 | 751.92  | 853.316  | 892.097  | 1040.437 | 1149.335 |
| 725  | 206.224 | 308.452 | 471.533 | 600.042 | 771.88  | 876.903  | 917.505  | 1069.887 | 1182.426 |
| 750  | 210.202 | 315.644 | 483.181 | 615.39  | 791.51  | 900.109  | 942.537  | 1098.895 | 1215.022 |
| 775  | 214.113 | 322.727 | 494.641 | 630.49  | 810.816 | 922.939  | 967.199  | 1127.464 | 1247.126 |
| 800  | 217.958 | 329.704 | 505.915 | 645.348 | 829.804 | 945.401  | 991.493  | 1155.601 | 1278.745 |
| 825  | 221.74  | 336.575 | 517.008 | 659.968 | 848.481 | 967.502  | 1015.425 | 1183.311 | 1309.887 |
| 850  | 225.459 | 343.343 | 527.924 | 674.355 | 866.855 | 989.25   | 1039     | 1210.602 | 1340.558 |
| 875  | 229.118 | 350.008 | 538.665 | 688.514 | 884.932 | 1010.652 | 1062.224 | 1237.481 | 1370.768 |
| 900  | 232.718 | 356.574 | 549.237 | 702.451 | 902.72  | 1031.717 | 1085.103 | 1263.955 | 1400.523 |
| 925  | 236.26  | 363.042 | 559.643 | 716.17  | 920.225 | 1052.451 | 1107.643 | 1290.033 | 1429.834 |
| 950  | 239.746 | 369.414 | 569.887 | 729.676 | 937.455 | 1072.864 | 1129.852 | 1315.723 | 1458.71  |
| 975  | 243.177 | 375.692 | 579.974 | 742.975 | 954.416 | 1092.961 | 1151.735 | 1341.031 | 1487.158 |
| 1000 | 246.555 | 381.878 | 589.906 | 756.071 | 971.114 | 1112.752 | 1173.299 | 1365.968 | 1515.188 |

**Table S6.** Gibbs free energy G (Hartree) variation with temperature (K) for product 1 structures

| Temperature (K) | Product 1: 1-mer | Product 1: 2-mer | Product 1: 3-mer | Product 1: 4-mer | Product 1: 5-mer | Product 1: 6-mer | Product 1: 7-mer | Product 1: 8-mer | Product 1: 9-mer |
|-----------------|------------------|------------------|------------------|------------------|------------------|------------------|------------------|------------------|------------------|
| 25              | -727.787         | -1531.45         | -2335.13         | -3138.8          | -3942.48         | -4746.19         | -5549.82         | -6353.54         | -7157.17         |
| 50              | -727.789         | -1531.45         | -2335.13         | -3138.8          | -3942.48         | -4746.2          | -5549.82         | -6353.54         | -7157.18         |
| 75              | -727.792         | -1531.46         | -2335.14         | -3138.81         | -3942.48         | -4746.2          | -5549.83         | -6353.55         | -7157.18         |
| 100             | -727.795         | -1531.46         | -2335.14         | -3138.81         | -3942.49         | -4746.21         | -5549.83         | -6353.55         | -7157.19         |
| 125             | -727.798         | -1531.47         | -2335.15         | -3138.82         | -3942.5          | -4746.22         | -5549.84         | -6353.56         | -7157.2          |
| 150             | -727.802         | -1531.47         | -2335.15         | -3138.82         | -3942.5          | -4746.23         | -5549.85         | -6353.57         | -7157.21         |
| 175             | -727.806         | -1531.48         | -2335.16         | -3138.83         | -3942.51         | -4746.24         | -5549.86         | -6353.59         | -7157.23         |
| 200             | -727.81          | -1531.48         | -2335.17         | -3138.84         | -3942.52         | -4746.25         | -5549.87         | -6353.6          | -7157.24         |
| 225             | -727.814         | -1531.49         | -2335.18         | -3138.85         | -3942.53         | -4746.26         | -5549.88         | -6353.61         | -7157.26         |
| 250             | -727.818         | -1531.49         | -2335.19         | -3138.86         | -3942.55         | -4746.28         | -5549.9          | -6353.63         | -7157.28         |
| 275             | -727.823         | -1531.5          | -2335.2          | -3138.87         | -3942.56         | -4746.29         | -5549.91         | -6353.65         | -7157.3          |
| 298.15          | -727.827         | -1531.51         | -2335.2          | -3138.88         | -3942.57         | -4746.31         | -5549.93         | -6353.67         | -7157.33         |
| 300             | -727.827         | -1531.51         | -2335.2          | -3138.88         | -3942.57         | -4746.31         | -5549.93         | -6353.67         | -7157.33         |
| 325             | -727.832         | -1531.51         | -2335.22         | -3138.89         | -3942.59         | -4746.33         | -5549.95         | -6353.69         | -7157.35         |
| 350             | -727.837         | -1531.52         | -2335.23         | -3138.9          | -3942.6          | -4746.35         | -5549.97         | -6353.71         | -7157.38         |

|      |          |          |          |          |          |          |          |          |          |
|------|----------|----------|----------|----------|----------|----------|----------|----------|----------|
| 375  | -727.843 | -1531.53 | -2335.24 | -3138.92 | -3942.62 | -4746.37 | -5549.99 | -6353.73 | -7157.41 |
| 400  | -727.848 | -1531.54 | -2335.25 | -3138.93 | -3942.64 | -4746.39 | -5550.01 | -6353.76 | -7157.44 |
| 425  | -727.854 | -1531.55 | -2335.26 | -3138.95 | -3942.66 | -4746.41 | -5550.03 | -6353.78 | -7157.47 |
| 450  | -727.86  | -1531.55 | -2335.28 | -3138.96 | -3942.68 | -4746.44 | -5550.05 | -6353.81 | -7157.5  |
| 475  | -727.866 | -1531.56 | -2335.29 | -3138.98 | -3942.7  | -4746.46 | -5550.08 | -6353.84 | -7157.54 |
| 500  | -727.872 | -1531.57 | -2335.3  | -3138.99 | -3942.72 | -4746.49 | -5550.1  | -6353.87 | -7157.58 |
| 525  | -727.878 | -1531.58 | -2335.32 | -3139.01 | -3942.74 | -4746.52 | -5550.13 | -6353.9  | -7157.61 |
| 550  | -727.885 | -1531.59 | -2335.33 | -3139.03 | -3942.76 | -4746.54 | -5550.16 | -6353.93 | -7157.65 |
| 575  | -727.891 | -1531.61 | -2335.35 | -3139.05 | -3942.79 | -4746.57 | -5550.19 | -6353.96 | -7157.7  |
| 600  | -727.898 | -1531.62 | -2335.37 | -3139.07 | -3942.81 | -4746.6  | -5550.22 | -6354    | -7157.74 |
| 625  | -727.905 | -1531.63 | -2335.38 | -3139.09 | -3942.84 | -4746.64 | -5550.25 | -6354.03 | -7157.78 |
| 650  | -727.912 | -1531.64 | -2335.4  | -3139.11 | -3942.86 | -4746.67 | -5550.28 | -6354.07 | -7157.83 |
| 675  | -727.919 | -1531.65 | -2335.42 | -3139.13 | -3942.89 | -4746.7  | -5550.32 | -6354.11 | -7157.88 |
| 700  | -727.927 | -1531.66 | -2335.44 | -3139.15 | -3942.92 | -4746.74 | -5550.35 | -6354.15 | -7157.93 |
| 725  | -727.934 | -1531.68 | -2335.46 | -3139.18 | -3942.95 | -4746.77 | -5550.38 | -6354.19 | -7157.98 |
| 750  | -727.942 | -1531.69 | -2335.48 | -3139.2  | -3942.98 | -4746.81 | -5550.42 | -6354.23 | -7158.03 |
| 775  | -727.95  | -1531.7  | -2335.49 | -3139.22 | -3943.01 | -4746.85 | -5550.46 | -6354.27 | -7158.08 |
| 800  | -727.958 | -1531.72 | -2335.51 | -3139.25 | -3943.04 | -4746.88 | -5550.5  | -6354.32 | -7158.14 |
| 825  | -727.966 | -1531.73 | -2335.54 | -3139.27 | -3943.07 | -4746.92 | -5550.54 | -6354.36 | -7158.19 |
| 850  | -727.974 | -1531.74 | -2335.56 | -3139.3  | -3943.1  | -4746.96 | -5550.58 | -6354.41 | -7158.25 |
| 875  | -727.982 | -1531.76 | -2335.58 | -3139.33 | -3943.13 | -4747    | -5550.62 | -6354.46 | -7158.31 |
| 900  | -727.991 | -1531.77 | -2335.6  | -3139.35 | -3943.17 | 0.56728  | -5550.66 | -6354.5  | -7158.37 |
| 925  | -728     | -1531.79 | -2335.62 | -3139.38 | -3943.2  | 0.524724 | -5550.7  | -6354.55 | -7158.43 |
| 950  | -728.008 | -1531.8  | -2335.64 | -3139.41 | -3943.24 | 0.481343 | -5550.75 | -6354.6  | -7158.49 |
| 975  | -728.017 | -1531.82 | -2335.67 | -3139.44 | -3943.27 | 0.437154 | -5550.79 | -6354.66 | -7158.55 |
| 1000 | -728.026 | -1531.83 | -2335.69 | -3139.47 | -3943.31 | 0.392166 | -5550.84 | -6354.71 | -7158.62 |

**Table S7.** Gibbs free energy G (Hartree) variation with temperature (K) for product 2 structures

| Temperature (K) | Product 2: 1-mer | Product 2: 2-mer | Product 2: 3-mer | Product 2: 4-mer | Product 2: 5-mer | Product 2: 6-mer | Product 2: 7-mer | Product 2: 8-mer | Product 2: 9-mer |
|-----------------|------------------|------------------|------------------|------------------|------------------|------------------|------------------|------------------|------------------|
| 25              | -804.185         | -1607.86         | -2411.56         | -3215.16         | -4018.88         | -4822.58         | -5626.3          | -6429.96         | -7233.61         |
| 50              | -804.188         | -1607.87         | -2411.57         | -3215.17         | -4018.89         | -4822.59         | -5626.3          | -6429.96         | -7233.61         |
| 75              | -804.191         | -1607.87         | -2411.57         | -3215.17         | -4018.89         | -4822.59         | -5626.31         | -6429.97         | -7233.62         |
| 100             | -804.194         | -1607.87         | -2411.58         | -3215.18         | -4018.9          | -4822.6          | -5626.32         | -6429.98         | -7233.62         |
| 125             | -804.197         | -1607.88         | -2411.58         | -3215.18         | -4018.9          | -4822.61         | -5626.32         | -6429.99         | -7233.63         |
| 150             | -804.201         | -1607.88         | -2411.59         | -3215.19         | -4018.91         | -4822.62         | -5626.33         | -6430            | -7233.65         |
| 175             | -804.205         | -1607.89         | -2411.59         | -3215.2          | -4018.92         | -4822.63         | -5626.35         | -6430.01         | -7233.66         |
| 200             | -804.209         | -1607.89         | -2411.6          | -3215.21         | -4018.93         | -4822.64         | -5626.36         | -6430.02         | -7233.67         |
| 225             | -804.213         | -1607.9          | -2411.61         | -3215.22         | -4018.94         | -4822.65         | -5626.37         | -6430.04         | -7233.69         |

|        |          |          |          |          |          |          |          |          |          |
|--------|----------|----------|----------|----------|----------|----------|----------|----------|----------|
| 250    | -804.218 | -1607.9  | -2411.62 | -3215.23 | -4018.96 | -4822.66 | -5626.39 | -6430.06 | -7233.71 |
| 275    | -804.223 | -1607.91 | -2411.62 | -3215.24 | -4018.97 | -4822.68 | -5626.4  | -6430.07 | -7233.73 |
| 298.15 | -804.227 | -1607.92 | -2411.63 | -3215.25 | -4018.99 | -4822.69 | -5626.42 | -6430.09 | -7233.75 |
| 300    | -804.228 | -1607.92 | -2411.63 | -3215.25 | -4018.99 | -4822.7  | -5626.42 | -6430.09 | -7233.75 |
| 325    | -804.233 | -1607.92 | -2411.64 | -3215.26 | -4019    | -4822.71 | -5626.44 | -6430.11 | -7233.77 |
| 350    | -804.238 | -1607.93 | -2411.65 | -3215.27 | -4019.02 | -4822.73 | -5626.46 | -6430.14 | -7233.8  |
| 375    | -804.244 | -1607.94 | -2411.67 | -3215.29 | -4019.04 | -4822.75 | -5626.48 | -6430.16 | -7233.82 |
| 400    | -804.25  | -1607.95 | -2411.68 | -3215.3  | -4019.06 | -4822.77 | -5626.5  | -6430.19 | -7233.85 |
| 425    | -804.256 | -1607.96 | -2411.69 | -3215.32 | -4019.08 | -4822.79 | -5626.52 | -6430.21 | -7233.88 |
| 450    | -804.262 | -1607.96 | -2411.7  | -3215.33 | -4019.1  | -4822.82 | -5626.54 | -6430.24 | -7233.91 |
| 475    | -804.268 | -1607.97 | -2411.72 | -3215.35 | -4019.12 | -4822.84 | -5626.57 | -6430.27 | -7233.94 |
| 500    | -804.275 | -1607.98 | -2411.73 | -3215.37 | -4019.14 | -4822.87 | -5626.6  | -6430.3  | -7233.98 |
| 525    | -804.281 | -1607.99 | -2411.74 | -3215.39 | -4019.16 | -4822.89 | -5626.62 | -6430.33 | -7234.01 |
| 550    | -804.288 | -1608    | -2411.76 | -3215.41 | -4019.19 | -4822.92 | -5626.65 | -6430.37 | -7234.05 |
| 575    | -804.295 | -1608.01 | -2411.78 | -3215.43 | -4019.21 | -4822.95 | -5626.68 | -6430.4  | -7234.09 |
| 600    | -804.303 | -1608.02 | -2411.79 | -3215.45 | -4019.24 | -4822.98 | -5626.71 | -6430.44 | -7234.13 |
| 625    | -804.31  | -1608.03 | -2411.81 | -3215.47 | -4019.27 | -4823.01 | -5626.74 | -6430.47 | -7234.17 |
| 650    | -804.318 | -1608.05 | -2411.83 | -3215.49 | -4019.3  | -4823.04 | -5626.78 | -6430.51 | -7234.21 |
| 675    | -804.326 | -1608.06 | -2411.84 | -3215.51 | -4019.32 | -4823.07 | -5626.81 | -6430.55 | -7234.26 |
| 700    | -804.334 | -1608.07 | -2411.86 | -3215.53 | -4019.35 | -4823.11 | -5626.85 | -6430.59 | -7234.3  |
| 725    | -804.342 | -1608.08 | -2411.88 | -3215.56 | -4019.38 | -4823.14 | -5626.88 | -6430.64 | -7234.35 |
| 750    | -804.35  | -1608.09 | -2411.9  | -3215.58 | -4019.42 | -4823.18 | -5626.92 | -6430.68 | -7234.4  |
| 775    | -804.359 | -1608.11 | -2411.92 | -3215.61 | -4019.45 | -4823.21 | -5626.96 | -6430.72 | -7234.44 |
| 800    | -804.367 | -1608.12 | -2411.94 | -3215.63 | -4019.48 | -4823.25 | -5627    | -6430.77 | -7234.49 |
| 825    | -804.376 | -1608.13 | -2411.96 | -3215.66 | -4019.51 | -4823.29 | -5627.04 | -6430.82 | -7234.55 |
| 850    | -804.385 | -1608.15 | -2411.98 | -3215.68 | -4019.55 | -4823.33 | -5627.08 | -6430.86 | -7234.6  |
| 875    | -804.394 | -1608.16 | -2412    | -3215.71 | -4019.58 | -4823.37 | -5627.12 | -6430.91 | -7234.65 |
| 900    | -804.403 | -1608.17 | -2412.02 | -3215.74 | -4019.62 | -4823.41 | -5627.16 | -6430.96 | -7234.71 |
| 925    | -804.412 | -1608.19 | -2412.04 | -3215.77 | -4019.65 | -4823.45 | -5627.21 | -6431.01 | -7234.76 |
| 950    | -804.422 | -1608.2  | -2412.07 | -3215.8  | -4019.69 | -4823.49 | -5627.25 | -6431.06 | -7234.82 |
| 975    | -804.432 | -1608.22 | -2412.09 | -3215.83 | -4019.73 | -4823.54 | -5627.3  | -6431.12 | -7234.88 |
| 1000   | -804.441 | -1608.23 | -2412.11 | -3215.86 | -4019.77 | -4823.58 | -5627.34 | -6431.17 | -7234.94 |

**Table S8.** Variation of Gibbs free energy  $\Delta G$  (Hartree) change with temperature (K) for 9 Reaction pathway

| Temperature (K) | RXN 1    | RXN 2    | RXN 3    | RXN 4    | RXN 5    | RXN 6    | RXN 7    | RXN 8    | RXN 9    |
|-----------------|----------|----------|----------|----------|----------|----------|----------|----------|----------|
| 25              | 0.108057 | 0.091581 | 0.070495 | 0.118261 | 0.143005 | 0.144851 | 0.11951  | 0.10019  | 0.144242 |
| 50              | 0.105915 | 0.089152 | 0.067765 | 0.115995 | 0.140396 | 0.142317 | 0.117364 | 0.097894 | 0.141915 |

|        |          |          |          |          |          |          |          |          |          |
|--------|----------|----------|----------|----------|----------|----------|----------|----------|----------|
| 75     | 0.103634 | 0.08654  | 0.064898 | 0.113598 | 0.137501 | 0.139487 | 0.115219 | 0.095553 | 0.139333 |
| 100    | 0.101239 | 0.083793 | 0.061921 | 0.111044 | 0.134307 | 0.136359 | 0.113045 | 0.09317  | 0.136481 |
| 125    | 0.098745 | 0.080929 | 0.058844 | 0.108296 | 0.130804 | 0.132921 | 0.11082  | 0.090757 | 0.13334  |
| 150    | 0.09616  | 0.077963 | 0.055673 | 0.105334 | 0.126994 | 0.129168 | 0.108537 | 0.08833  | 0.129904 |
| 175    | 0.093494 | 0.074907 | 0.052414 | 0.102143 | 0.122879 | 0.125101 | 0.106188 | 0.0859   | 0.126172 |
| 200    | 0.090756 | 0.071761 | 0.049074 | 0.098725 | 0.118463 | 0.120725 | 0.103773 | 0.083473 | 0.122148 |
| 225    | 0.087956 | 0.068538 | 0.045665 | 0.095077 | 0.113762 | 0.116051 | 0.101294 | 0.081057 | 0.11784  |
| 250    | 0.085097 | 0.065243 | 0.042184 | 0.091208 | 0.108782 | 0.11109  | 0.09875  | 0.078647 | 0.11326  |
| 275    | 0.082184 | 0.061877 | 0.038642 | 0.087122 | 0.103539 | 0.105853 | 0.096146 | 0.076255 | 0.108415 |
| 298.15 | 0.079448 | 0.058706 | 0.035309 | 0.083155 | 0.098459 | 0.100771 | 0.093681 | 0.07405  | 0.10371  |
| 300    | 0.079228 | 0.058451 | 0.035042 | 0.082832 | 0.098044 | 0.100357 | 0.093485 | 0.073876 | 0.103324 |
| 325    | 0.076226 | 0.054964 | 0.031384 | 0.078343 | 0.092307 | 0.094612 | 0.090765 | 0.07151  | 0.097992 |
| 350    | 0.073183 | 0.051423 | 0.027679 | 0.073667 | 0.086345 | 0.088628 | 0.087993 | 0.069161 | 0.092433 |
| 375    | 0.070105 | 0.047829 | 0.023921 | 0.06881  | 0.080165 | 0.082419 | 0.085171 | 0.066823 | 0.086656 |
| 400    | 0.066994 | 0.044188 | 0.020122 | 0.063785 | 0.073781 | 0.076    | 0.082302 | 0.064502 | 0.080674 |
| 425    | 0.063853 | 0.040502 | 0.016278 | 0.058596 | 0.067201 | 0.069374 | 0.079389 | 0.062196 | 0.074495 |
| 450    | 0.060682 | 0.036771 | 0.012398 | 0.053254 | 0.060435 | 0.062553 | 0.076435 | 0.059906 | 0.068127 |
| 475    | 0.057485 | 0.033001 | 0.008476 | 0.047764 | 0.05349  | 0.055549 | 0.073439 | 0.057629 | 0.06158  |
| 500    | 0.054261 | 0.029193 | 0.004521 | 0.042132 | 0.046379 | 0.048371 | 0.070404 | 0.055366 | 0.054865 |
| 525    | 0.051015 | 0.025348 | 0.00053  | 0.036366 | 0.039102 | 0.04102  | 0.067335 | 0.053116 | 0.047984 |
| 550    | 0.047746 | 0.021469 | -0.00349 | 0.030473 | 0.031676 | 0.033512 | 0.064232 | 0.05088  | 0.040946 |
| 575    | 0.044457 | 0.017558 | -0.00754 | 0.024456 | 0.024102 | 0.025849 | 0.061096 | 0.048659 | 0.033761 |
| 600    | 0.041147 | 0.013616 | -0.01162 | 0.01832  | 0.016387 | 0.018038 | 0.057931 | 0.046448 | 0.026427 |
| 625    | 0.037819 | 0.009643 | -0.01573 | 0.012072 | 0.008535 | 0.010088 | 0.054734 | 0.044251 | 0.018957 |
| 650    | 0.034474 | 0.005644 | -0.01987 | 0.005715 | 0.000554 | 0.002    | 0.051512 | 0.042066 | 0.011356 |
| 675    | 0.031109 | 0.001617 | -0.02403 | -0.00075 | -0.00755 | -0.00622 | 0.048259 | 0.039892 | 0.003625 |
| 700    | 0.02773  | -0.00244 | -0.02821 | -0.00731 | -0.01578 | -0.01456 | 0.044983 | 0.03773  | -0.00423 |
| 725    | 0.024334 | -0.00651 | -0.03242 | -0.01397 | -0.02412 | -0.02303 | 0.041682 | 0.035581 | -0.0122  |
| 750    | 0.020924 | -0.01061 | -0.03665 | -0.02072 | -0.03257 | -0.03161 | 0.038358 | 0.033443 | -0.02029 |
| 775    | 0.017499 | -0.01474 | -0.04091 | -0.02757 | -0.04113 | -0.04031 | 0.035008 | 0.031314 | -0.02849 |
| 800    | 0.014062 | -0.01888 | -0.04518 | -0.0345  | -0.0498  | -0.04912 | 0.031639 | 0.029196 | -0.03679 |
| 825    | 0.01061  | -0.02305 | -0.04947 | -0.04152 | -0.05856 | -0.05803 | 0.028248 | 0.027089 | -0.0452  |
| 850    | 0.007144 | -0.02724 | -0.05379 | -0.04862 | -0.06743 | -0.06705 | 0.024836 | 0.024992 | -0.05372 |
| 875    | 0.003666 | -0.03145 | -0.05812 | -0.0558  | -0.07639 | -0.07616 | 0.021405 | 0.022906 | -0.06233 |
| 900    | 0.000178 | -0.03567 | -0.06247 | -0.06306 | -0.08544 | -0.08537 | 0.017953 | 0.020829 | -0.07103 |
| 925    | -0.00332 | -0.03992 | -0.06684 | -0.07039 | -0.09458 | -0.09468 | 0.014486 | 0.018761 | -0.07983 |
| 950    | -0.00684 | -0.04418 | -0.07123 | -0.07779 | -0.1038  | -0.10407 | 0.010999 | 0.016702 | -0.08871 |
| 975    | -0.01036 | -0.04847 | -0.07563 | -0.08527 | -0.11312 | -0.11356 | 0.007493 | 0.014652 | -0.09769 |
| 1000   | -0.01389 | -0.05276 | -0.08005 | -0.09282 | -0.12251 | -0.12313 | 0.003971 | 0.012612 | -0.10675 |



**Table S9.** Heat capacity  $C_p$  (Cal mol<sup>-1</sup> K<sup>-1</sup>), Entropy  $S$  (Cal mol<sup>-1</sup> K<sup>-1</sup>) and Gibbs free energy  $G$  (Hartree) variation with temperature (K) for 10-mer reactant structure

| Temperature (K) | $C_p$ (Cal mol <sup>-1</sup> K <sup>-1</sup> ) | $S$ (Cal mol <sup>-1</sup> K <sup>-1</sup> ) | $G$ (Hartree) |
|-----------------|------------------------------------------------|----------------------------------------------|---------------|
| 25              | 50.485                                         | 102.317                                      | -7961.5       |
| 50              | 105.941                                        | 149.937                                      | -7961.51      |
| 75              | 163.227                                        | 198.002                                      | -7961.51      |
| 100             | 219.207                                        | 246.096                                      | -7961.52      |
| 125             | 271.898                                        | 293.604                                      | -7961.53      |
| 150             | 321.22                                         | 340.209                                      | -7961.54      |
| 175             | 368.042                                        | 385.864                                      | -7961.56      |
| 200             | 413.392                                        | 430.688                                      | -7961.58      |
| 225             | 458.058                                        | 474.862                                      | -7961.59      |
| 250             | 502.463                                        | 518.566                                      | -7961.61      |
| 275             | 546.694                                        | 561.944                                      | -7961.63      |
| 298.15          | 587.375                                        | 601.904                                      | -7961.66      |
| 300             | 590.609                                        | 605.09                                       | -7961.66      |
| 325             | 633.941                                        | 648.051                                      | -7961.68      |
| 350             | 676.386                                        | 690.834                                      | -7961.71      |
| 375             | 717.664                                        | 733.421                                      | -7961.74      |
| 400             | 757.547                                        | 775.776                                      | -7961.77      |
| 425             | 795.87                                         | 817.853                                      | -7961.8       |
| 450             | 832.535                                        | 859.606                                      | -7961.83      |
| 475             | 867.496                                        | 900.988                                      | -7961.87      |
| 500             | 900.755                                        | 941.96                                       | -7961.9       |
| 525             | 932.347                                        | 982.485                                      | -7961.94      |
| 550             | 962.33                                         | 1022.535                                     | -7961.98      |
| 575             | 990.777                                        | 1062.085                                     | -7962.02      |
| 600             | 1017.771                                       | 1101.117                                     | -7962.07      |
| 625             | 1043.398                                       | 1139.62                                      | -7962.11      |
| 650             | 1067.743                                       | 1177.585                                     | -7962.16      |
| 675             | 1090.888                                       | 1215.007                                     | -7962.21      |
| 700             | 1112.914                                       | 1251.885                                     | -7962.26      |
| 725             | 1133.893                                       | 1288.219                                     | -7962.31      |
| 750             | 1153.896                                       | 1324.014                                     | -7962.36      |
| 775             | 1172.984                                       | 1359.273                                     | -7962.41      |
| 800             | 1191.216                                       | 1394.004                                     | -7962.47      |
| 825             | 1208.645                                       | 1428.213                                     | -7962.52      |
| 850             | 1225.319                                       | 1461.908                                     | -7962.58      |
| 875             | 1241.284                                       | 1495.099                                     | -7962.64      |
| 900             | 1256.579                                       | 1527.794                                     | -7962.7       |
| 925             | 1271.241                                       | 1560.002                                     | -7962.76      |

|     |          |          |          |
|-----|----------|----------|----------|
| 950 | 1285.305 | 1591.734 | -7962.82 |
|-----|----------|----------|----------|

| Structure        | Spin density                                                                        | HOMO                                                                                 | LUMO                                                                                  |
|------------------|-------------------------------------------------------------------------------------|--------------------------------------------------------------------------------------|---------------------------------------------------------------------------------------|
| Product 1: 1-mer | 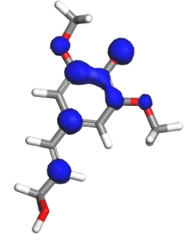   |     |    |
| Product 1: 3-mer |    |     |    |
| Product 1: 5-mer |   |    |   |
| Product 1: 7-mer |  |  |  |
| 975              | 1298.803                                                                            | 1622.998                                                                             | -7962.89                                                                              |
| 1000             | 1311.762                                                                            | 1653.805                                                                             | -7962.95                                                                              |

|                  |                                                                                     |                                                                                      |                                                                                       |
|------------------|-------------------------------------------------------------------------------------|--------------------------------------------------------------------------------------|---------------------------------------------------------------------------------------|
| Product 1: 9-mer | 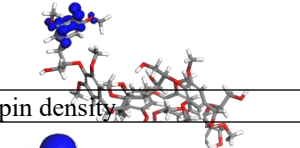   |    |    |
| Structure        | Spin density                                                                        | HOMO                                                                                 | LUMO                                                                                  |
| Product 2: 1-mer |    |    |    |
| Product 2: 3-mer |    |    |    |
| Product 2: 5-mer |    |    |    |
| Product 2: 7-mer |  |  |  |

**Table S10a:** Spin density and Molecular orbital plots for product 1 species

**Table S10b:** Spin density and Molecular orbital plots for product 2 species

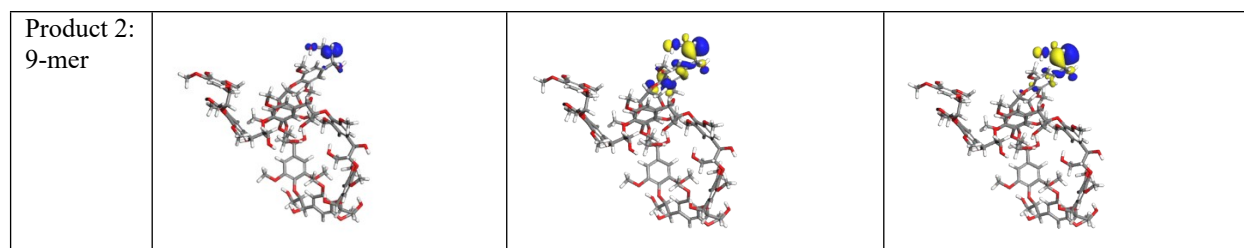

**Table S11.** Key results of the Paired T test to identify if statistically significant variation exists between the mean BDEs calculated using soft and hardwood model lignin decamers

| Temperature (K) | P(T<=t) two-tail for all reaction pathways studied with model lignin decamers consisting of Guaiacyl and Syringyl monolignols (assumed $\alpha = 0.05$ ) |
|-----------------|----------------------------------------------------------------------------------------------------------------------------------------------------------|
| 298.25          | 0.261870227                                                                                                                                              |
| 400             | 0.246180446                                                                                                                                              |
| 500             | 0.24047412                                                                                                                                               |
| 600             | 0.248023298                                                                                                                                              |
| 700             | 0.273068126                                                                                                                                              |
| 800             | 0.320542329                                                                                                                                              |
| 900             | 0.390688541                                                                                                                                              |
| 1000            | 0.478746282                                                                                                                                              |

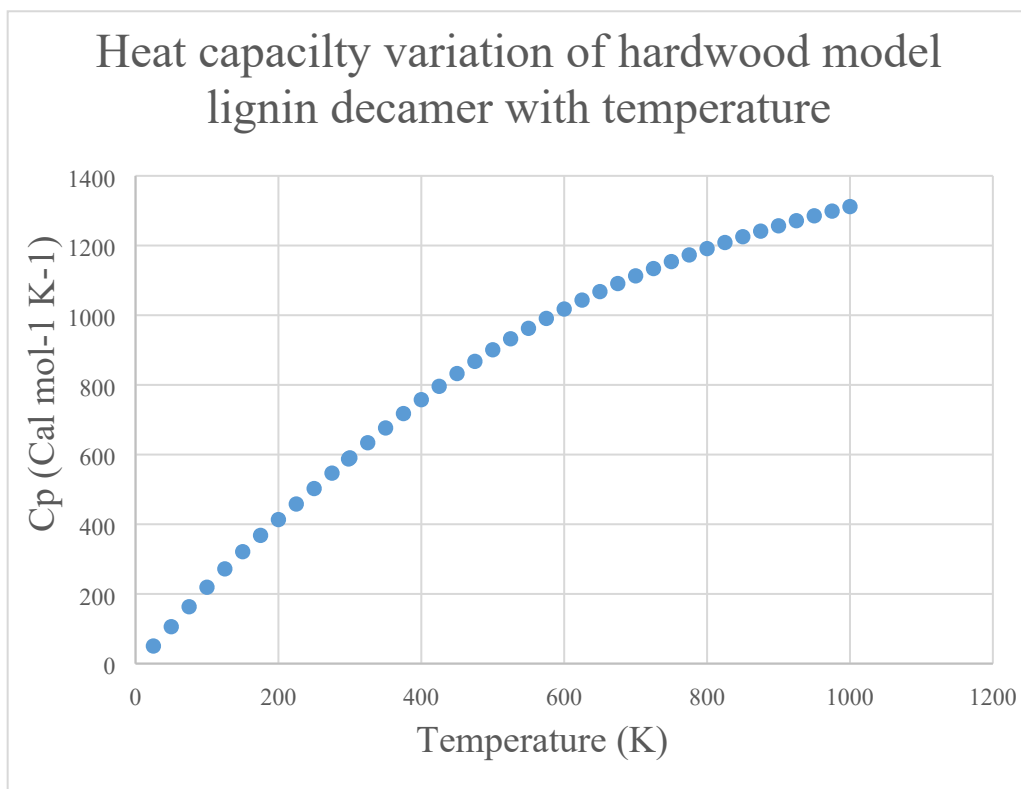

**Figure S1.** Heat capacity variation with temperature for 10-mer reactant structure of hardwood model lignin

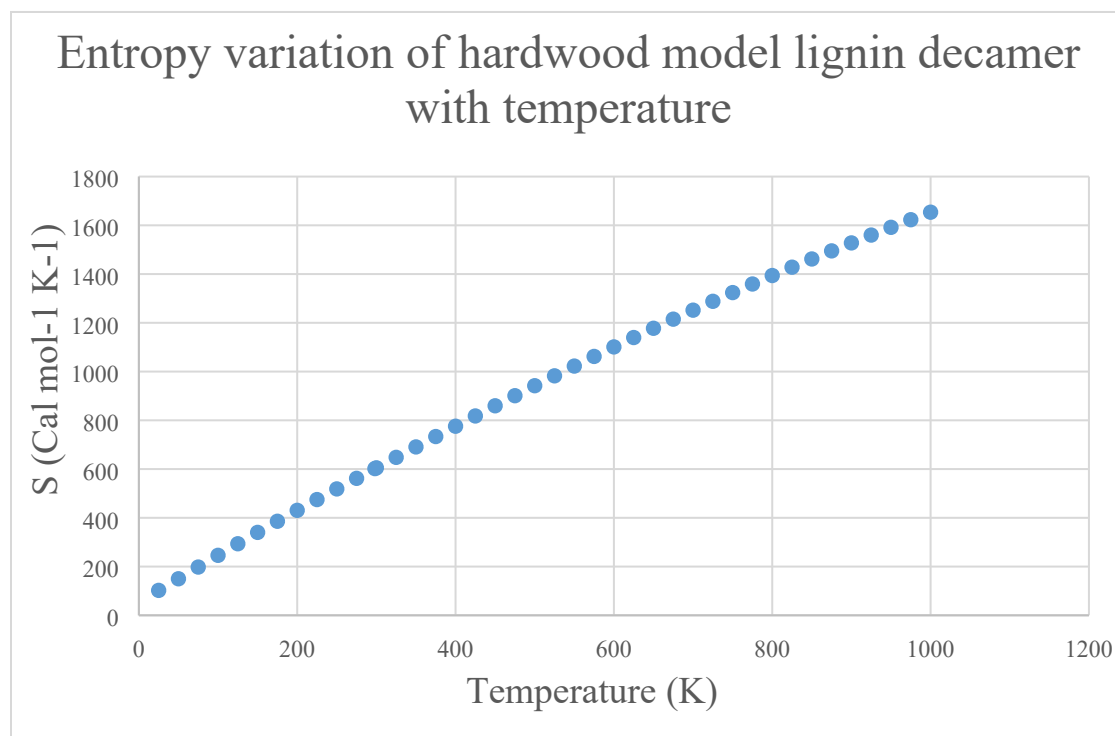

**Figure S2.** Entropy variation with temperature for 10-mer reactant structure of hardwood model lignin

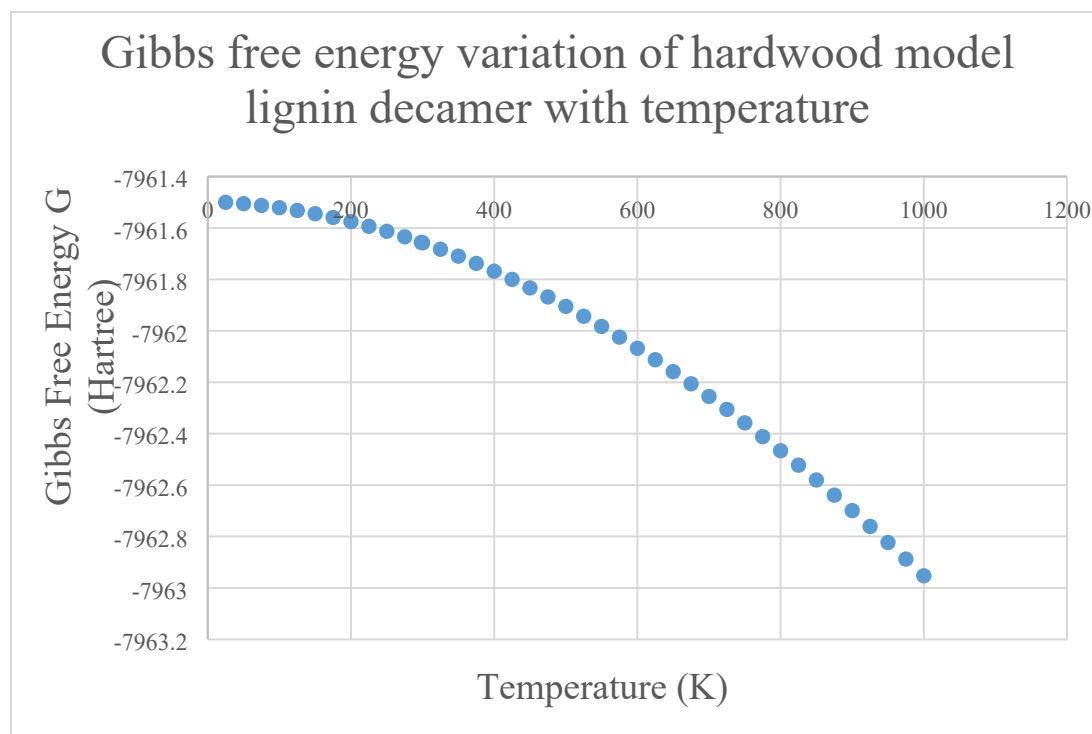

**Figure S3.** Gibbs free energy variation with temperature for 10-mer reactant structure of hardwood model lignin

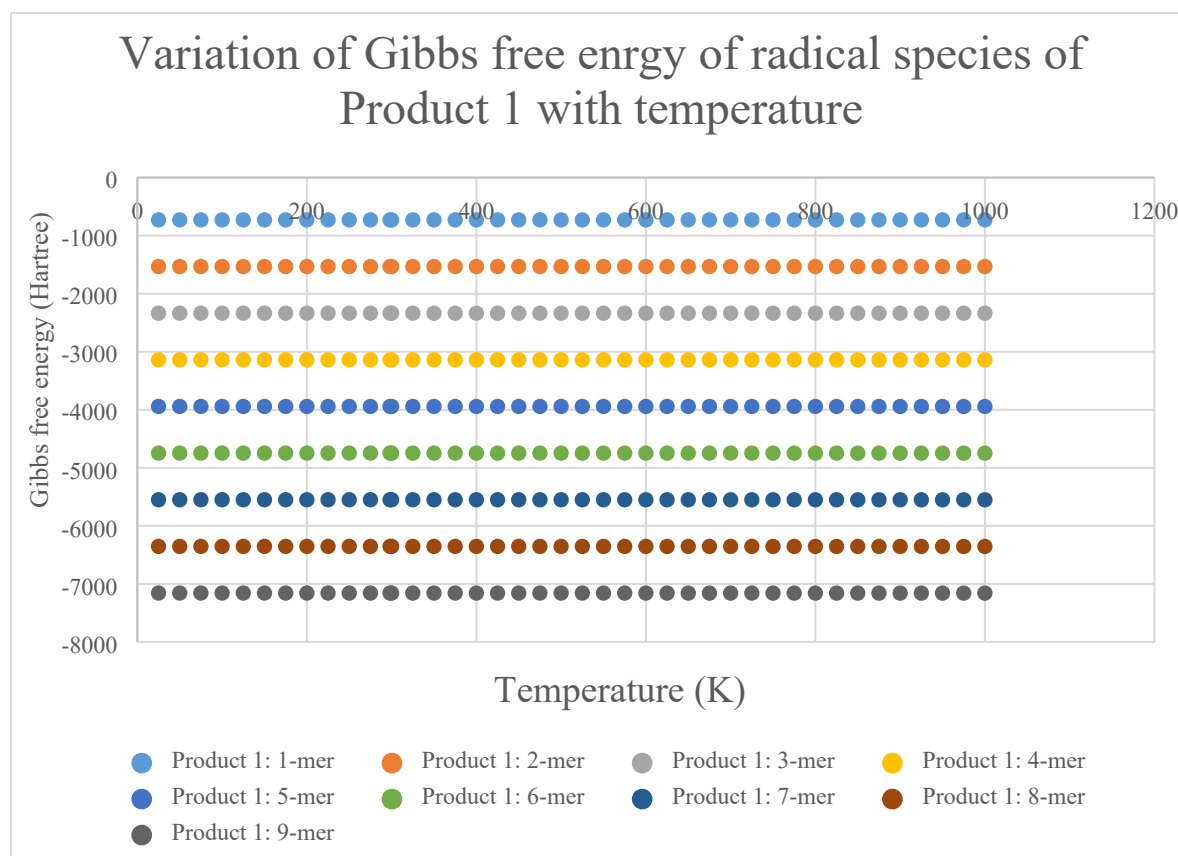

**Figure S4.** Gibbs free energy variation with temperature for product 1 radical species



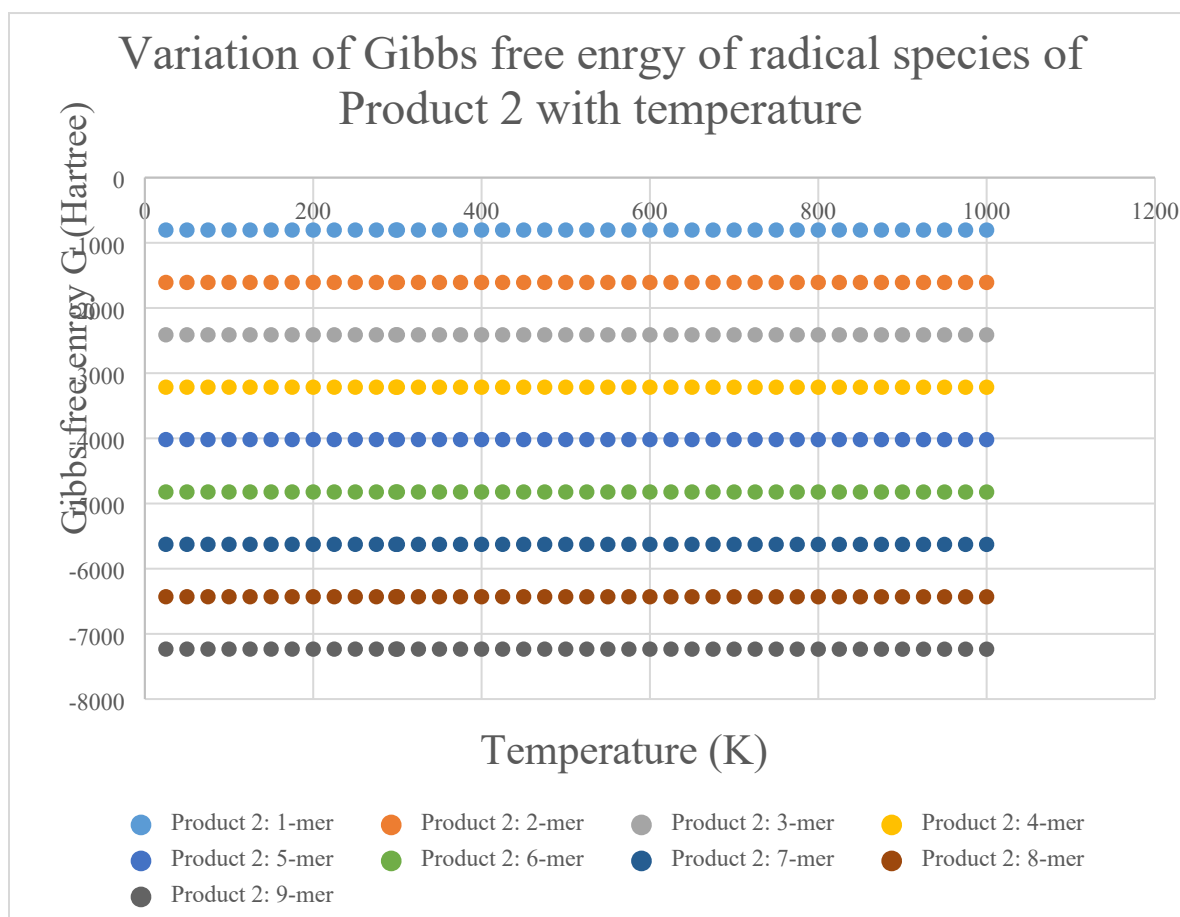

**Figure S5.** Gibbs free energy variation with temperature for product 2 radical species

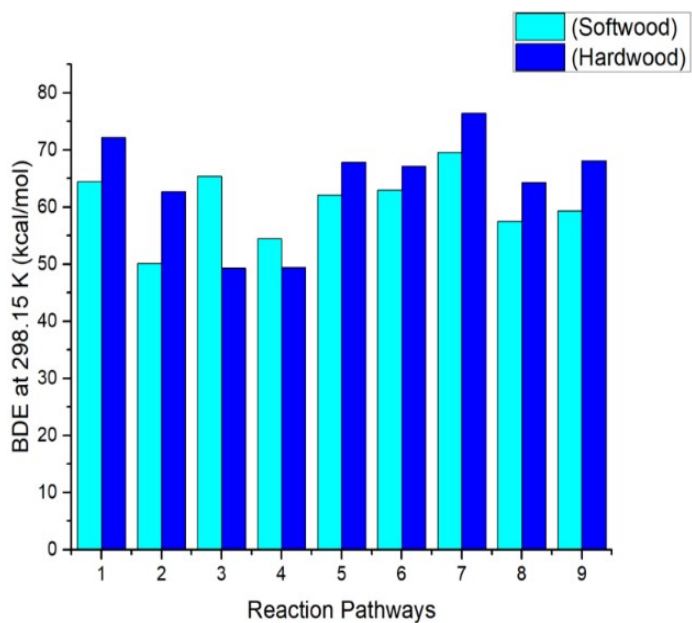

**Figure S6.** Comparison between the current study for BDEs for the hardwood model lignin and the calculated BDEs with a softwood model lignin in our previous study.

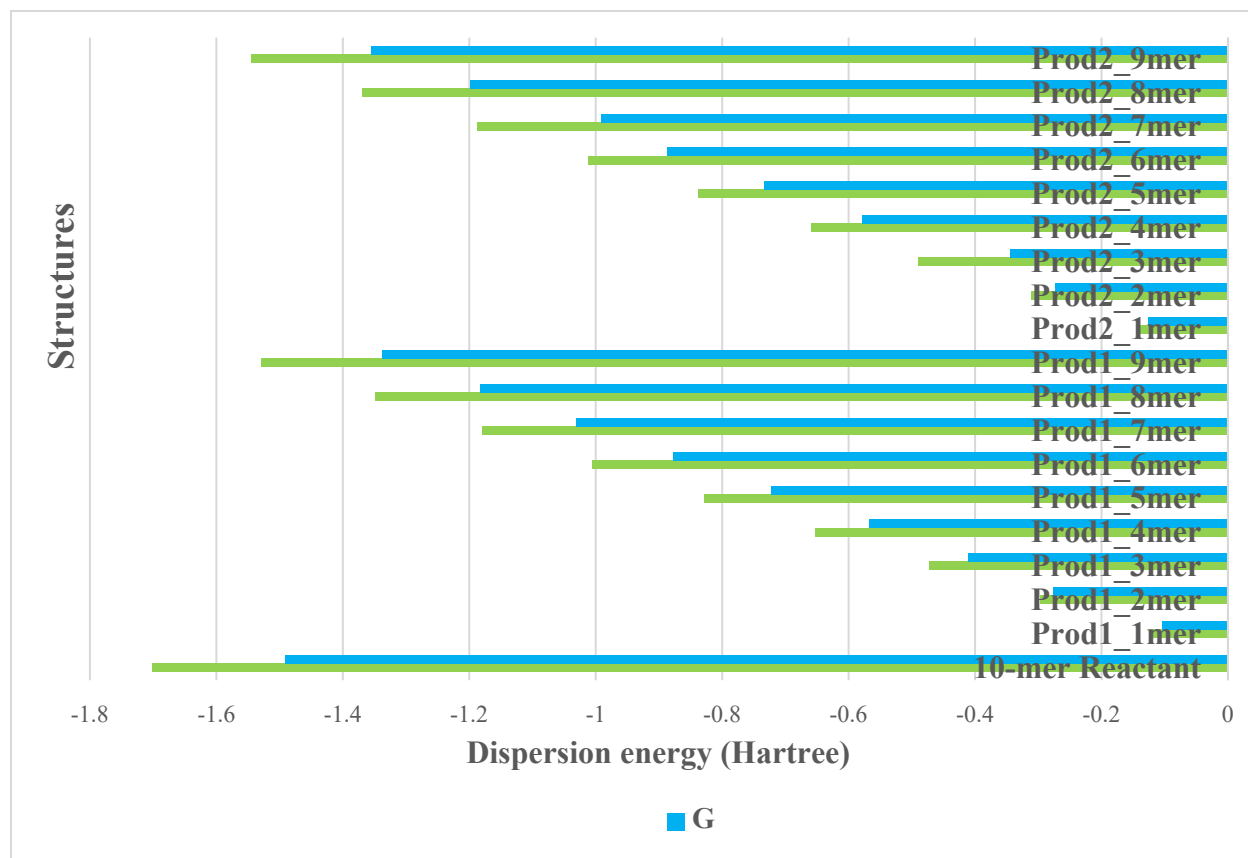

**Figure S7.** Comparison between non-bonded interaction energies for all structures between current study (hardwood model lignin with S units) and previous study (softwood model lignin with G units)
